# Supplementary material
Source: MDPI journal article supplement (https://www.mdpi.com/2073-4433/15/3/336)
Supplement: s1 [file s1 › atmosphere-2851500-supplementary.pdf]

# Supplementary Materials: Using a Low-Cost Sensor to Estimate Fine Particulate Matter: A Case Study in Samutprakarn, Thailand

Supichaya Roddee <sup>1</sup>, Supachai Changphuek <sup>1</sup>, Supet Jirakajohnkool <sup>1</sup>, Panatda Tochaiyaphum <sup>1</sup>, Worradorn Phairuang <sup>2,3</sup>, Thaneeya Chetianukornkul <sup>4</sup> and Yaowatat Boongla <sup>1,\*</sup>

**Table S1.** List of acronyms used in study.

| Abbreviation      | Term                                      |
|-------------------|-------------------------------------------|
| °C                | Degrees Celsius                           |
| µg                | Microgram                                 |
| µg/m <sup>3</sup> | Microgram per cubic meter                 |
| AA                | Ambient air                               |
| AQ                | Air quality                               |
| AQI               | Air quality index                         |
| AQS               | Air quality standards                     |
| AP                | Air pollution                             |
| BAM               | Beta attenuation monitor                  |
| CO                | Carbon monoxide                           |
| DFH               | Dust from home                            |
| DFH 1             | 1 <sup>st</sup> dust from home            |
| DFH 2             | 2 <sup>nd</sup> dust from home            |
| DFH 3             | 3 <sup>rd</sup> dust from home            |
| DFH 4             | 4 <sup>th</sup> dust from home            |
| EPA               | Environmental Protection Agency (federal) |
| GIS               | Geo-graphical information systems         |
| km                | kilometer                                 |
| LCD               | Liquid crystal display                    |
| LCS               | Low-cost sensors                          |
| L/min             | Liter per minute                          |
| m                 | Meter                                     |
| m <sup>3</sup>    | Cubic meter                               |
| Min.              | Minimum                                   |
| Max.              | Maximum                                   |
| NA                | Non-available                             |
| NO <sub>2</sub>   | Nitrogen dioxide                          |
| O <sub>3</sub>    | Ozone                                     |
| PCD               | Pollution Control Department              |
| PMS               | Plan-tower laser dust sensor              |
| PM                | Particulate matter                        |

| Abbreviation      | Term                                                                  |
|-------------------|-----------------------------------------------------------------------|
| PM <sub>10</sub>  | Particulate Matter with an aerodynamic diameter less than 10 microns  |
| PM <sub>2.5</sub> | Particulate matter with an aerodynamic diameter less than 2.5 microns |
| PM <sub>1.0</sub> | Particulate matter with an aerodynamic diameter less than 1 microns   |
| RH                | Relative humidity                                                     |
| SEA               | Southeast Asia                                                        |
| S.D.              | Standard deviation                                                    |
| SO <sub>2</sub>   | Sulfur dioxide                                                        |
| SPSS              | the Statistical Package for Social Science                            |
| Temp.             | Temperature                                                           |
| TEOM              | Tapered element oscillating microbalance                              |
| TMD               | Thai Meteorological Department                                        |
| USA               | United States of America                                              |
| US EPA            | United States Environmental Protection Agency                         |
| vs.               | Versus                                                                |
| WHO               | World Health Organization                                             |

### **Tapered element oscillating microbalance (TEOM)**

A tapered element oscillating microbalance (TEOM) detects aerosol particles in real time by detecting their mass concentration. It uses a small vibrating glass tube whose oscillation frequency changes when aerosol particles are deposited on it, increasing its inertia. The United States Environmental Protection Agency has certified TEOM-based devices for monitoring environmental air quality.

The Tapered Element Oscillating Microbalance (TEOM) employs an oscillating tapered glass tube (the tapered element) which is clamped at one end and fitted with filter on the other end. As air is pulled through the tube at a constant rate, particles collect on the frequency in an identifiable manner based upon the known spring rate of the tube. From this change, mass can be determined and, applying the flow rate, mass concentration can be calculated. The device is shown in Table S2. The ambient air enters an EPA standard PM-10 size selective inlet. Because this standard dictates the flow rate of 1 m<sup>3</sup>/hr (16.7 L/min), and the tapered element assembly dictates a lower flow rate, the air is isokinetically split into a 3 L/min sample stream directed to the filter and the remainder (a 13.7 L/min stream) is bypassed. To measure PM<sub>2.5</sub> concentrations, a sharp cut cyclone is placed immediately downstream of the PM<sub>10</sub> size selective inlet and prior to the isokinetic flow splitter.

Upon exit from the splitter, air flows through the inlet tube heater, to drive away moisture and to maintain a consistent temperature, and then through a 2.5 cm diameter glass fiber filter. The mass deposited on the sampler decreases the oscillating tapered element's frequency, which allows a mass concentration to be calculated. Because the tapered element is very sensitive to mass changes, continuous monitoring on a real time basis is possible. Upstream of the filter, the incoming air is heated via an inlet tube that is maintained at a constant temperature, typically 50°C, to avoid measurement problems associated with moisture or thermal expansion of the tapered element. The temperature

can also be set at 30°C. Although the choice of temperature can be made by the user, the default temperature provided by the manufacturer is 50°C.

**Table S2.** Specific of Tapered Element Oscillating Microbalance (TEOM) ambient particulate monitor.

| Specifications                        |                                                           |
|---------------------------------------|-----------------------------------------------------------|
| Principle                             | vibration                                                 |
| Measurement range                     | 0 to 1 g/m <sup>3</sup>                                   |
| High                                  | 3 m.                                                      |
| Flow rate through sample inlet        | 16.7 l/min (1 m <sup>3</sup> /hr)                         |
| PM-2.5 flow rate                      | 3 l/min                                                   |
| PM-Coarse flow rate                   | 1.67 l/min                                                |
| Long-term averaging                   | 1, 8, 24 hr                                               |
| Temperature of sample stream          | 30°C                                                      |
| Particulate matter mass concentration | less than 5 µg/m <sup>3</sup> to several g/m <sup>3</sup> |

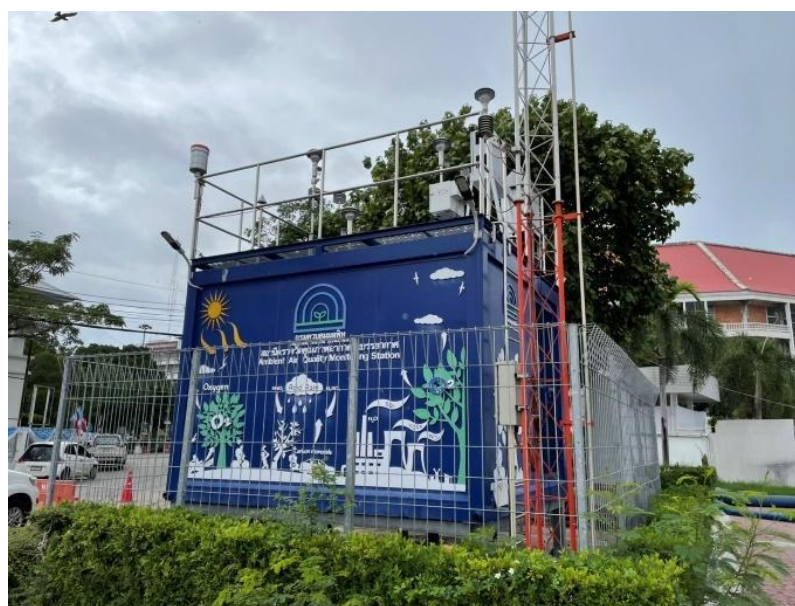

**Figure S1.** TEOM at air monitoring station of Pollution Control Department (PCD) (18T).

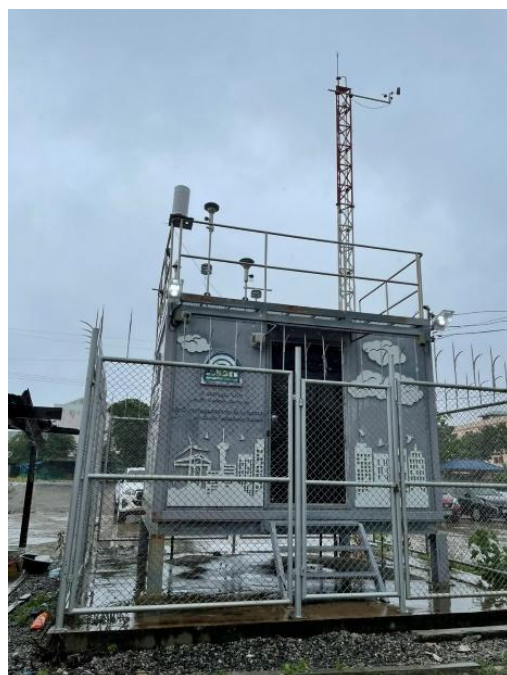

**Figure S2.** TEOM at air monitoring station of Pollution Control Department (PCD) (19T).

## References

1. Pollution Control Department (PCD), Thailand. Thailand Air Quality Standard. Available online: <http://air4thai.pcd.go.th/law/2768> (accessed on 15 January 2024).
2. United States Environmental Protection Agency (U.S. EPA). Standard Operating Procedure for the Continuous Measurement of Particulate Matter. [https://www.epa.gov/sites/default/files/2021-03/documents/905505\\_teom\\_sop\\_draft\\_final\\_sept09.pdf](https://www.epa.gov/sites/default/files/2021-03/documents/905505_teom_sop_draft_final_sept09.pdf) (accessed on 15 January 2024).
3. United States Environmental Protection Agency (U.S. EPA). List of Designated Reference and Equivalent Methods; U.S. Environmental Protection Agency: Washington, DC, USA, **2017** (accessed on 15 January 2024).
4. United States Environmental Protection Agency (U.S. EPA). Performance Testing Protocols, Metrics, and Target Values for Fine Particulate Matter Air Sensor; U.S. Environmental Protection Agency: Washington, DC, USA, **2021** (accessed on February 4, 2024).
5. Patashnick, H.; Rupprecht, E.G. Continuous PM-10 Measurements using the Tapered Element Oscillating Microbalance. *Air Waste Manage. Assoc.* **1991**, 1079–1083.
6. Cyrys, J.; Dietrich, G.; Kreyling, W.; Tuch, T.; Heinrich, J. PM<sub>2.5</sub> measurements in ambient aerosol: comparison between Harvard impactor (HI) and the tapered element oscillating microbalance (TEOM) system. *Sci. Total Environ.* **2001**, 191–197, [https://doi.org/10.1016/S0048-9697\(01\)00648-9](https://doi.org/10.1016/S0048-9697(01)00648-9).
